# Supplementary material for: Impairment of Nucleolin Activity and Phosphorylation by a Trachylobane Diterpene from Psiadia punctulata in Cancer Cells
Source: MDPI journal article supplement (doi:10.3390/ijms231911390), 2022-09-27
Supplement: s1 [file s1]

## Supporting Information

### Table of contents

|                   |                                                                                                                                                                                                                                                                                                                                                                                                                                                                                                                                                                                                                         |    |
|-------------------|-------------------------------------------------------------------------------------------------------------------------------------------------------------------------------------------------------------------------------------------------------------------------------------------------------------------------------------------------------------------------------------------------------------------------------------------------------------------------------------------------------------------------------------------------------------------------------------------------------------------------|----|
| <b>Figure S1.</b> | (A) Chemical structure of compounds 1–16 and oridonin. (B) Representative western blot of the nucleolin level in the CETSA-based screening performed in Jurkat cell line                                                                                                                                                                                                                                                                                                                                                                                                                                                | S3 |
| <b>Figure S2.</b> | Representative western blot of the nucleolin level in CETSA experiment on the effects of compound <b>12</b> on the HeLa cells at different temperatures                                                                                                                                                                                                                                                                                                                                                                                                                                                                 | S3 |
| <b>Figure S3.</b> | Representative western blot of the nucleolin level in CETSA performed using various concentrations of compound <b>12</b>                                                                                                                                                                                                                                                                                                                                                                                                                                                                                                | S4 |
| <b>Figure S4</b>  | SPR sensorgrams obtained for the interaction of compound <b>12</b> with hNcl (A) and RNA-BD 1,2 (B)                                                                                                                                                                                                                                                                                                                                                                                                                                                                                                                     | S4 |
| <b>Figure S5</b>  | (A) Docked pose of oridonin (salmon sticks) within RBD1,2 represented as a slate ribbon model. Only amino acids located within 4 Å of the bound ligand are displayed (white sticks) and labelled. H-bonds are depicted as dashed black lines (B) Two-dimensional ligand interaction diagram of oridonin docked pose. Positively charged amino acids are represented with dark-blue drops, negatively charged amino acids are represented with red drops, polar amino acids are represented with light-blue drops and hydrophobic amino acids are represented with green drops. H-bonds are depicted with purple arrows. | S5 |

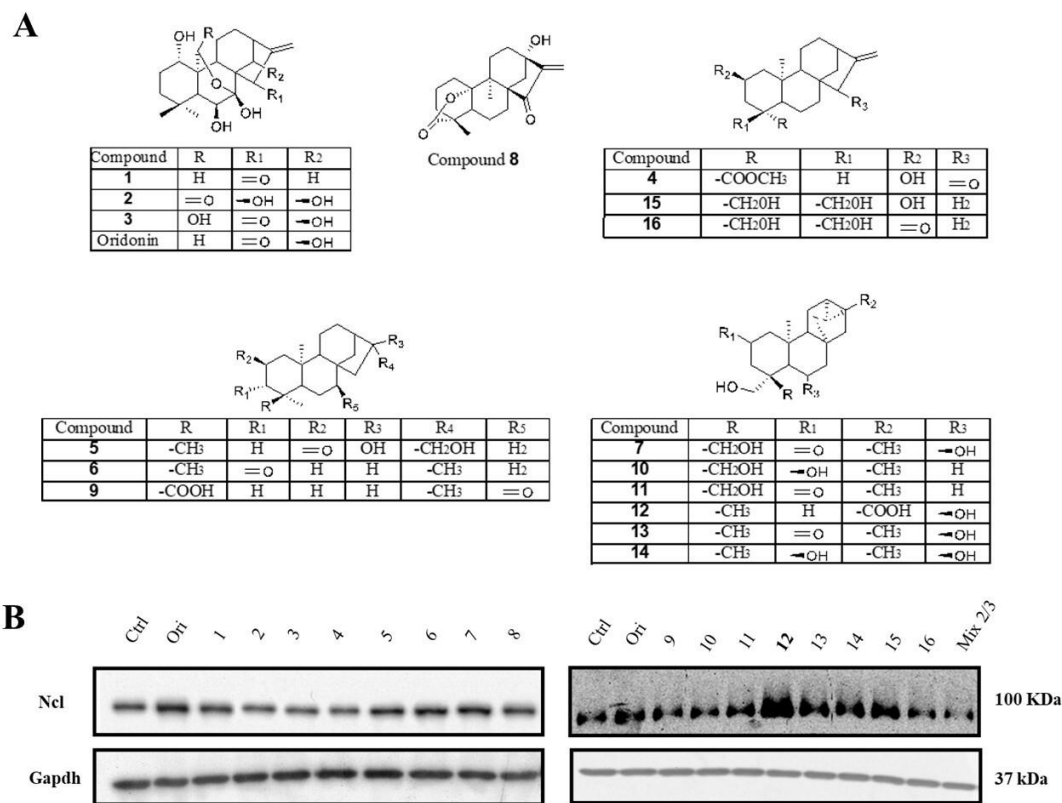

**Figure S1.** (A) Chemical structure of compounds **1-16** and Oridonin. (B) Representative western blot analysis of nucleolin level in the CETSA-based screening performed in Jurkat cell line

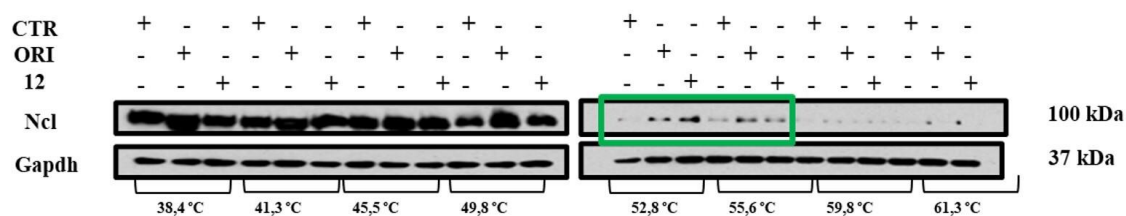

**Figure S2.** Representative western blot analysis of Nucleolin level in CETSA experiment of **12** on HeLa cells to different temperatures

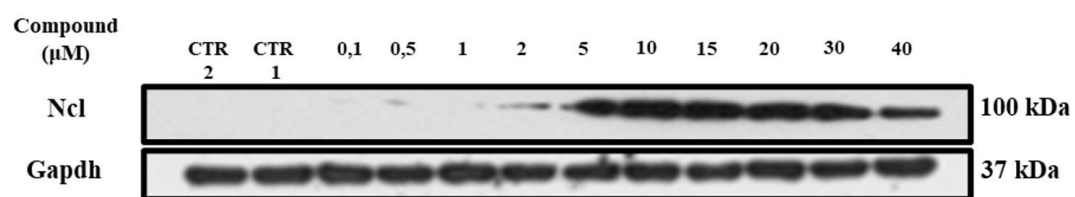

**Figure S3.** Representative western blot analysis of Nucleolin level in CETSA performed using various concentrations of **12**

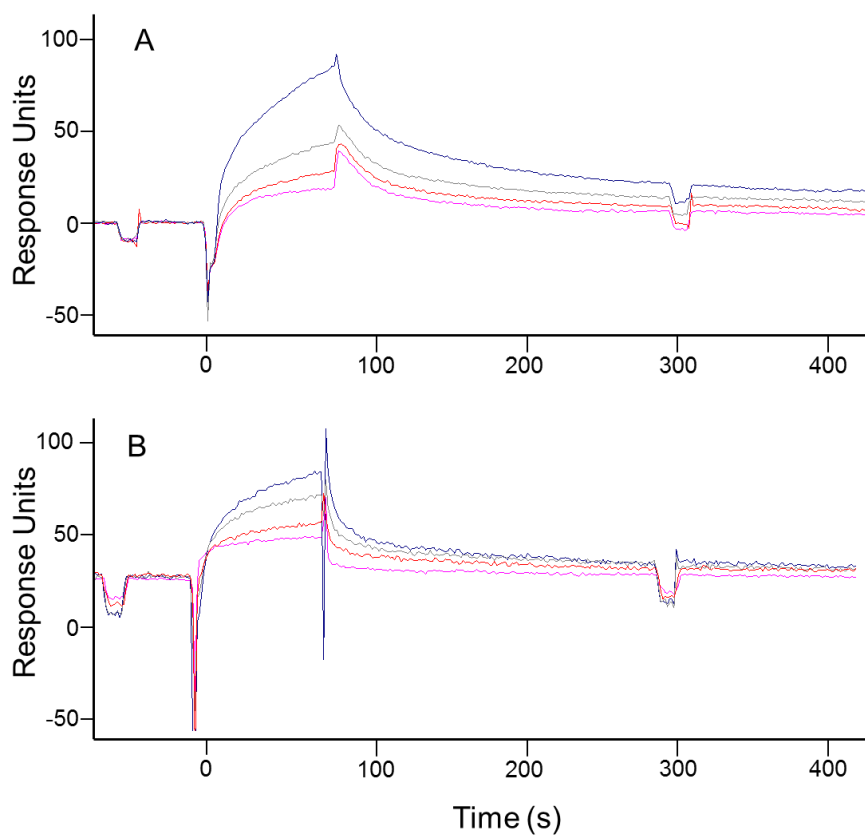

**Figure S4.** SPR sensorgrams obtained for the interaction of **12** with hNCL (A) and RBD 1,2 (B)

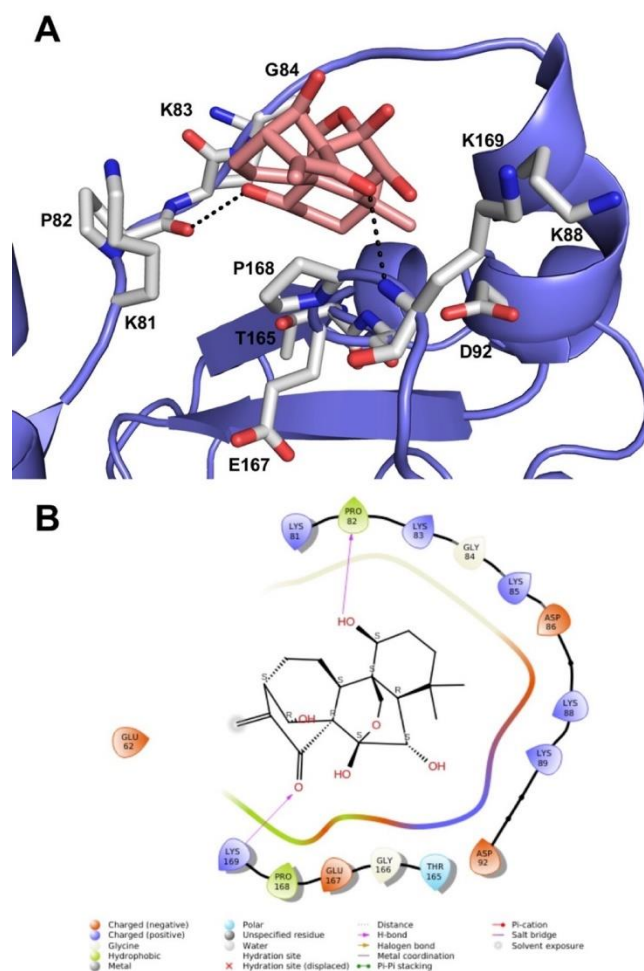

**Figure S5.** (A) Docked pose of oridonin (salmon sticks) within RBD1,2 represented as a slate ribbon model. Only amino acids located within 4 Å of the bound ligand are displayed (white sticks) and labelled. H-bonds are depicted as dashed black lines (B) Two-dimensional ligand interaction diagram of oridonin docked pose. Positively charged amino acids are represented with dark-blue drops, negatively charged amino acids are represented with red drops, polar amino acids are represented with light-blue drops and hydrophobic amino acids are represented with green drops. H-bonds are depicted with purple arrows.
